# Supplementary material for: Novel Single Nucleotide Polymorphisms and Haplotype of MYF5 Gene Are Associated with Body Measurements and Ultrasound Traits in Grassland Short-Tailed Sheep
Source: MDPI journal article supplement (doi:10.3390/genes13030483), 2022-03-09
Supplement: s1 [file s1]

**Table S1.** Primers and amplification conditions for identifying SNPs.

| Name   | Primer (5'-3')                                     | Tm(°C) | Production size (bp) | Amplified region               |
|--------|----------------------------------------------------|--------|----------------------|--------------------------------|
| MYF5-1 | F:AGGAGCCAGAT-TTCAAGGG<br>R:CCACAG-TCTAAACAGCCAAGC | 61     | 792                  | Promoter                       |
| MYF5-2 | F:ACACGAGCCAAGAAA-GAT<br>R:TTACCTAAAC-CAAGGGACA    | 57     | 771                  | Promoter                       |
| MYF5-3 | F:GCAAGTAAGCG-GATTGGG<br>R:TGGTTAGGTTGGTCGTG       | 61     | 729                  | 5'UTR, partial exon1           |
| MYF5-4 | F:GAGTGGCTGCTTTCGG<br>R:GTTGCCTTTA-GATGTTAGTGTATG  | 57     | 758                  | Partial exon1, partial intron1 |
| MYF5-5 | F:GGATAGTTGGG-TATTGGG<br>R:GA-TAGGGCTGTTACATTCA    | 57     | 786                  | Intron1, partial exon2         |
| MYF5-6 | F:CCTTGCGATTGGTGAG<br>R:TGATAAAATGAGCCTG-GAA       | 60     | 824                  | Exon2, intron2, exon3          |
| MYF5-7 | F:CAGCACCGATTCTCAG<br>R:ATACCAACAGGACCTAA          | 60     | 823                  | 3'UTR                          |

**Table S2.** SNaPshot single base extension primers

| Name    | Primer (5'-3')                                 | Production size | Amplified region |
|---------|------------------------------------------------|-----------------|------------------|
| MYF5-P1 | F:CCTGAGCTCGCTAGCCTCGAGTGGTGGTGGTAGAGGTTGTGTCT | 1859bp          | -1799/+59        |
| MYF5-P2 | F:CCTGAGCTCGCTAGCCTCGAGAGTGTGTGAAGTTACTCGGTCG  | 1257bp          | -1197/+59        |
| MYF5-P3 | F:CCTGAGCTCGCTAGCCTCGAGAAAGAGAGAAAGCCAGGGGTG   | 926bp           | -866/+59         |
| MYF5-P4 | F:CCTGAGCTCGCTAGCCTCGAGGGTGTCAACTGAAATGGGGAGC  | 574bp           | -514/+59         |
| MYF5-P5 | F:CCTGAGCTCGCTAGCCTCGAGCGGTGGGATATGCTAATAGTGCG | 301bp           | -241/+59         |
| MYF5-R  | R:CAGTACCGGATTGCCAAGCTTCAGGAGCCGTCGTAGAAGTACTC |                 |                  |

**Table S3.** Homologous recombination primer designed for construction of expression vector

| SNP name | Primer (5'-3')                                    | Tm(°C) |
|----------|---------------------------------------------------|--------|
| SNP1     | TTTTTTTTTTTAGAGGGAGAAGGGAGACGA                    | 55     |
| SNP2     | TTTTTTTTTTTTTGGGAAAGAGAGAAAGCCAGG                 | 55     |
| SNP3     | TTTTTTTTTTTTTTTTTCTCAATAACACAAAGCCTACATA          | 55     |
| SNP4     | TTTTTTTTTTTTTTTTTTTTTTTTTCTCTGTACCTGCTAGGGCTT     | 58     |
| SNP5     | TTTTTTTTTTTTTTTTTTTTTTTTTTTCTACTCTAGGTGCACACTGAA  | 58     |
| SNP6     | TTTTTTTTTTTTTTTTTTTTTTTTTTTTTTGTATGTCAAGGTCCACTGG | 58     |
| SNP7     | TATATCTAAAGCAAAGATGAAGGAAAA                       | 60     |

**Table S4** The primer information of the base mutation of SNP2

| Primer name     | Sequence (5'-3')           | Tm(°C) |
|-----------------|----------------------------|--------|
| Base mutation F | CACAAAGCCTACATAATGGCAATCTG | 55     |
| Base mutation R | GGGAGTTATTGTGTTTCGGATGTATT |        |
| Wild type F     | CTCGAGTCAACAAACAGGCGCAGAA  | 55     |
| Wild type R     | AAGCTTACAGGAGGGCCAGGTGACCA |        |
